# Supplementary material
Source: publisher site journal article supplement (https://www.dovepress.com/article/450484)
Supplement: Supplementary file 1 [file get_supplementary_file.php]

**Appendix 1**

**Video scripts**

| =Video | Duration | Superstitious facts: | Forensic knowledge |
| --- | --- | --- | --- |
| 1 | 22 minutes | cadavers can speak to the forensic practitioner  Cadavers can move  Cadavers can breathe  There are voices in the morgue that only forensic practitioners can hear  Signs of alarm appear on the cadaver face in cases of homicide | 1. DNA is unique for every person 2. Distance of firing can be identified by size of the inlet wound 3. Inlet wounds might be smaller than expected due to skin elasticity 4. In cases of drowning the cadaver may be bloated by effect of putrefactive gases 5. Identifying time of death is within a range 6. Fingerprints are unique for every person 7. Everything in forensic medicine is a probability 8. Firearm injuries facilitate identification of mode of death 9. There are protocols for diagnosis of death 10. Inlet wounds are bigger by the effect of gases 11. Sometimes firearm injuries come with only internal haemorrhage 12. Cadavers go through primary and secondary flaccidity 13. Cadaver posture and hand muscle rigidity informs homicide 14. There is a delay in putrefaction in cases of drowning 15. Death from hypothermia needs time to be diagnosed 16. Electrocution is hard to identify sometimes, and you need to look for a point of entrance 17. Not all cadavers go through putrefaction some experience mummification or saponification |
| 2 | 5 minutes | Cadavers can communicate their mode of death | 1. External observation of nails in a case of fall from height can identify mode of death |
| 3 | 4 minutes | Bones can communicate with their family members | 1. Face biometrics can be used to identify individuals |
| 4 | 3 minutes | Every dead person has his own halo | 1. There are different types of identifying prints including:  - Fingerprint - Lip print - Footprint - Face print - DNA - Hand |
